# Supplementary material for: Wall loss of semi-volatile organic compounds in a Teflon bag chamber for the temperature range of 262–298 K
Source: Copernicus journal article supplement (doi:10.5194/amt-2023-187), 2023-08-31
Supplement: Supplementary file 1 [file amt-2023-187-supplement.pdf]

*Supplement of*

**Wall loss of semi-volatile organic compounds in a Teflon bag chamber for the temperature range of 262-298 K**

Longkun He<sup>1</sup>, Wenli Liu<sup>2</sup>, Yatai Li<sup>1,3</sup>, Jixuan Wang<sup>1</sup>, Mikinori Kuwata<sup>2</sup>, Yingjun Liu<sup>1</sup>

<sup>1</sup>State Key Joint Laboratory of Environmental Simulation and Pollution Control, College of Environmental Sciences and Engineering, Peking University, Beijing, 100871, China

<sup>2</sup>Department of Atmospheric and Oceanic Sciences and Laboratory for Climate and Ocean-Atmosphere Studies, School of Physics, Peking University, Beijing 100871, China

<sup>3</sup>Now at College of Public Health, Zhengzhou University, Zhengzhou, 450001, China

*Correspondence to:* Mikinori Kuwata ([kuwata@pku.edu.cn](mailto:kuwata@pku.edu.cn)), Yingjun Liu ([yingjun.liu@pku.edu.cn](mailto:yingjun.liu@pku.edu.cn))

**Table S1.** List of n-alkanes used for the present study, along with the saturation vapor pressure at 298 K predicted by the EVAPORATION group contribution method (Comperolle et al., 2011). All the chemicals were purchased from Konoscience.

| compound name         | carbon number | CAS number | purity | saturation vapor pressure (Pa) |
|-----------------------|---------------|------------|--------|--------------------------------|
| <i>n</i> -tetradecane | 14            | 629-59-4   | 99%    | 2.8E+00                        |
| <i>n</i> -pentadecane | 15            | 629-62-9   | 98%    | 9.2E-01                        |
| <i>n</i> -hexadecane  | 16            | 544-76-3   | 98%    | 3.0E-01                        |
| <i>n</i> -heptadecane | 17            | 629-78-7   | 99%    | 1.0E-01                        |
| <i>n</i> -octadecane  | 18            | 593-45-3   | 99%    | 3.3E-02                        |
| <i>n</i> -nonadecane  | 19            | 629-92-5   | 98%    | 1.1E-02                        |

**Table S2.** Abundances of diisobutyl phthalate (DiBP) and dibutyl phthalate (DnBP) in the chamber and outside of the chamber (*i.e.*, room air in the laboratory) detected by the SV-TAG during one experiment at room temperature. The chemical species were selected, as they were abundant in the room air of the laboratory. The minimum concentration in the chamber bag suggests that intrusion of the room air into the experimental setup was minimal. Peak areas were integrated by Agilent MassHunter Station Quantitative Analysis (10.0, Agilent Technologies, Inc.).

| time after injection (min)              | peak area (counts) |         | ratio of inside chamber to room air |       |
|-----------------------------------------|--------------------|---------|-------------------------------------|-------|
|                                         | DiBP               | DnBP    | DiBP                                | DnBP  |
| chamber background (0)                  | 15618              | 12532   | 0.44%                               | 0.47% |
| 73                                      | 16197              | 15266   | 0.46%                               | 0.57% |
| 133                                     | 19457              | 24483   | 0.55%                               | 0.91% |
| 206                                     | 18029              | 20958   | 0.51%                               | 0.78% |
| 406                                     | 18920              | 21996   | 0.53%                               | 0.82% |
| 553                                     | 13110              | 13526   | 0.37%                               | 0.50% |
| 733                                     | 13073              | 11923   | 0.37%                               | 0.45% |
| 936                                     | 14189              | 12866   | 0.40%                               | 0.48% |
| <i>Reference value for the room air</i> | 3539783            | 2679338 | -                                   | -     |

**Table S3.** Optimized parameter sets of the two-layer model used in Figure 3. Best-fit parameter sets were obtained by the Newton method via Wolfram Mathematica 13.1.

| Compound                         | forward rate, $k_1$ ( $\text{min}^{-1}$ ) | backward rate, $k_{-1}$ ( $\text{min}^{-1}$ ) | first-order loss rate, $k_2$ ( $\text{min}^{-1}$ ) <sup>a</sup> |
|----------------------------------|-------------------------------------------|-----------------------------------------------|-----------------------------------------------------------------|
| C <sub>14</sub> <i>n</i> -alkane | 0.017                                     | 0.012                                         | 0.0006                                                          |
| C <sub>15</sub> <i>n</i> -alkane | 0.017                                     | 0.012                                         | 0.0011                                                          |
| C <sub>16</sub> <i>n</i> -alkane | 0.020                                     | 0.011                                         | 0.0016                                                          |
| C <sub>17</sub> <i>n</i> -alkane | 0.028                                     | 0.011                                         | 0.0022                                                          |
| C <sub>18</sub> <i>n</i> -alkane | 0.038                                     | 0.013                                         | 0.0026                                                          |
| C <sub>19</sub> <i>n</i> -alkane | 0.070                                     | 0.013                                         | 0.0028                                                          |

a.  $k_2$  obtained here was not used in Section 3.3 (characterization of diffusion in the Teflon wall). These fitting overestimated the first-order loss rate constant for low volatile species, C<sub>16</sub> – C<sub>19</sub> *n*-alkanes, as shown in Figure 3.

**Table S4.** List of investigated chemical species by each study in Figure 6.

| Source                       | chemical species                                                                           |
|------------------------------|--------------------------------------------------------------------------------------------|
| This work                    | <i>n</i> -alkanes                                                                          |
| Yeh and Ziemann (2015)       | 2-ketones, 2-alcohols, monoacids, and 1,2-diols                                            |
| Matsunaga and Ziemann (2010) | <i>n</i> -alkanes and 1-alkenes                                                            |
| Yeh and Ziemann (2014)       | alkylnitrates                                                                              |
| Krechmer et al. (2016)       | dihydroxynitrates (DHNs), dihydroxycarbonylnitrates (DHCNs), and trihydroxynitrates (THNs) |

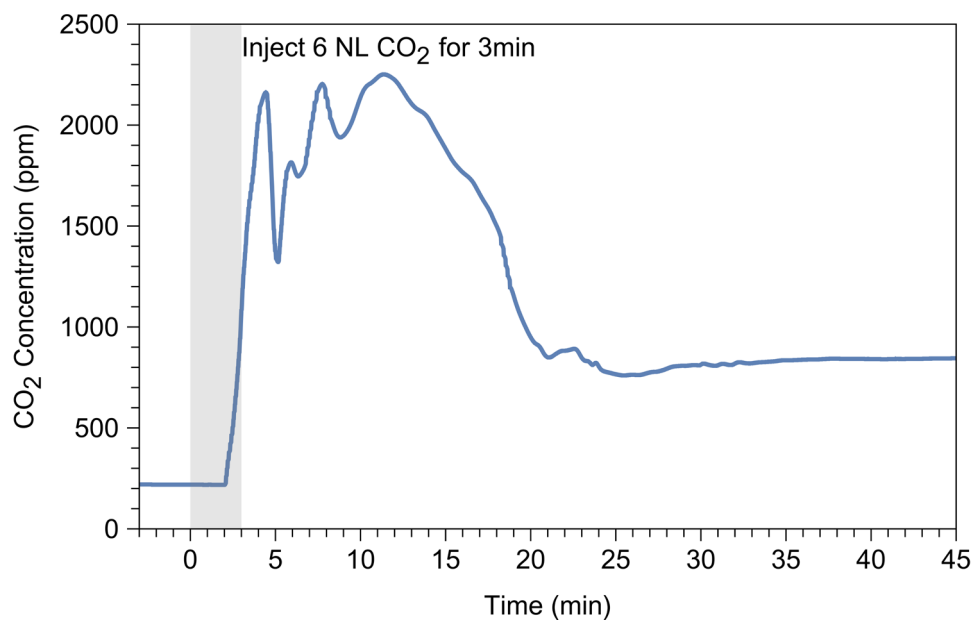

**Figure S1.** Time series of CO<sub>2</sub> concentration in the Teflon chamber for the experiment of testing the chamber volume. 6 NL (normal condition volume, at 273.15 K) of CO<sub>2</sub> was injected during the first 3 mins (gray area in the figure). CO<sub>2</sub> concentration was continuously measured by a CO<sub>2</sub> analyzer (SBA-5, PP System Inc.) at the opposite side of the chamber. The bag volume was determined to be 990 L at room temperature by the change in the CO<sub>2</sub> concentration. The measured volume was used in data analysis. The time scale for the complete mixing of CO<sub>2</sub> was approximately 30 mins.

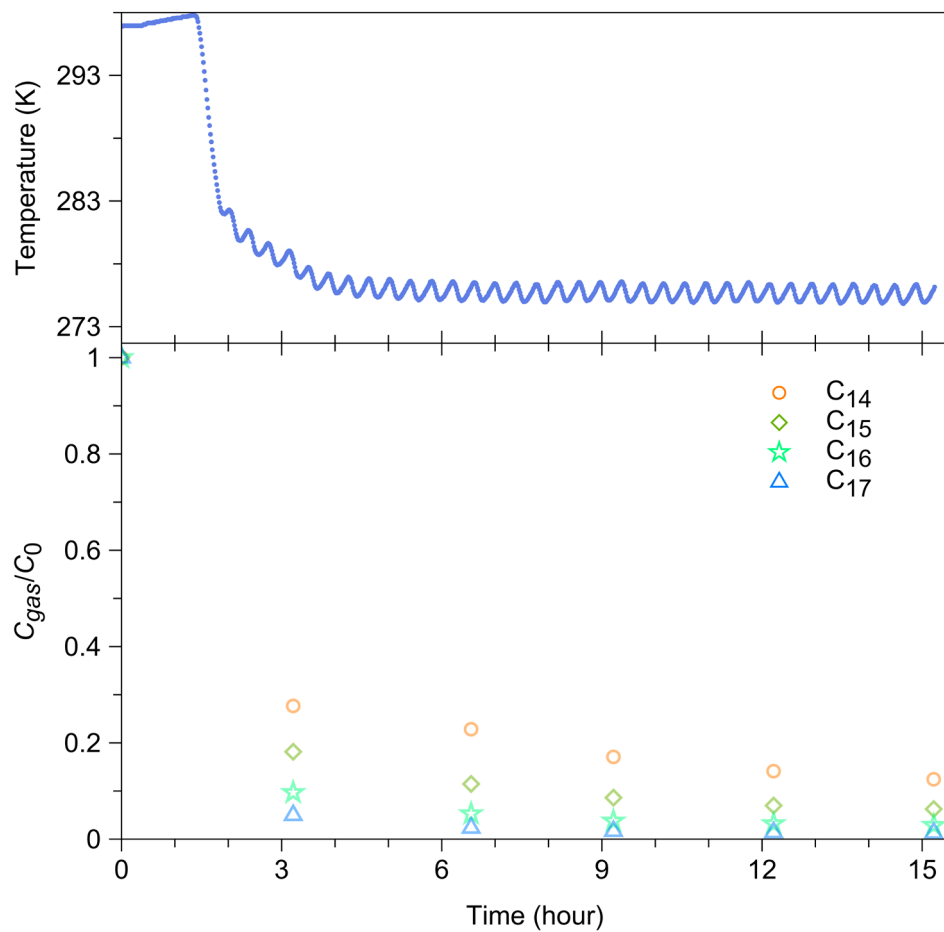

**Figure S2.** The values of  $C_{gas}/C_0$  for  $C_{14}$ - $C_{17}$   $n$ -alkanes measured in the gas phase for the experiment at  $275.7 \pm 0.5$  K. The freezer was turned on after 1 hour of the completion of the injection.

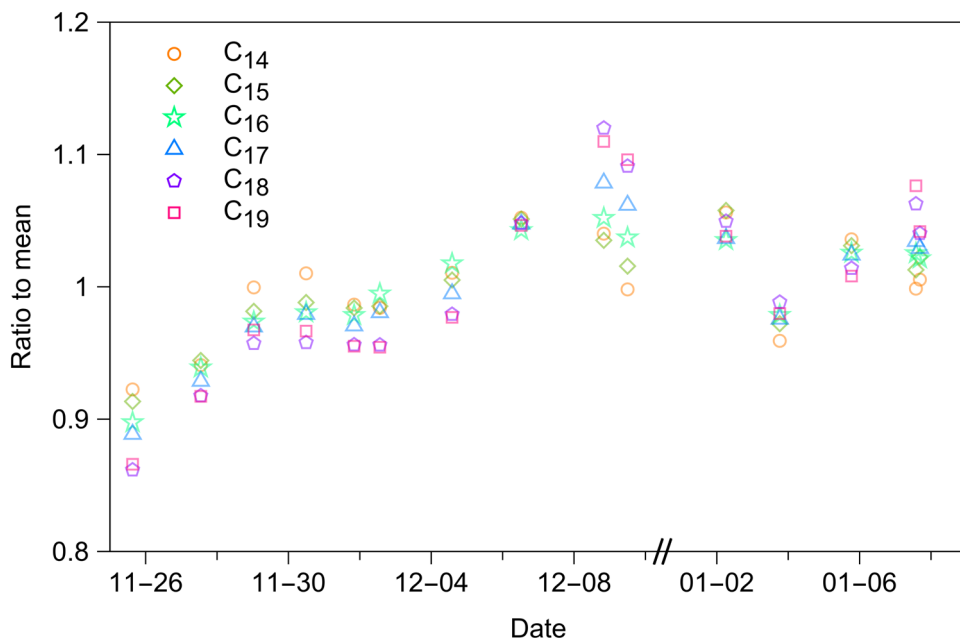

**Figure S3.** Relative changes in the peak areas of the standard *n*-alkanes solution during the experiment period. The data suggested that the sensitivity of the SV-TAG was stable within the fluctuation of  $\pm 10\%$ .



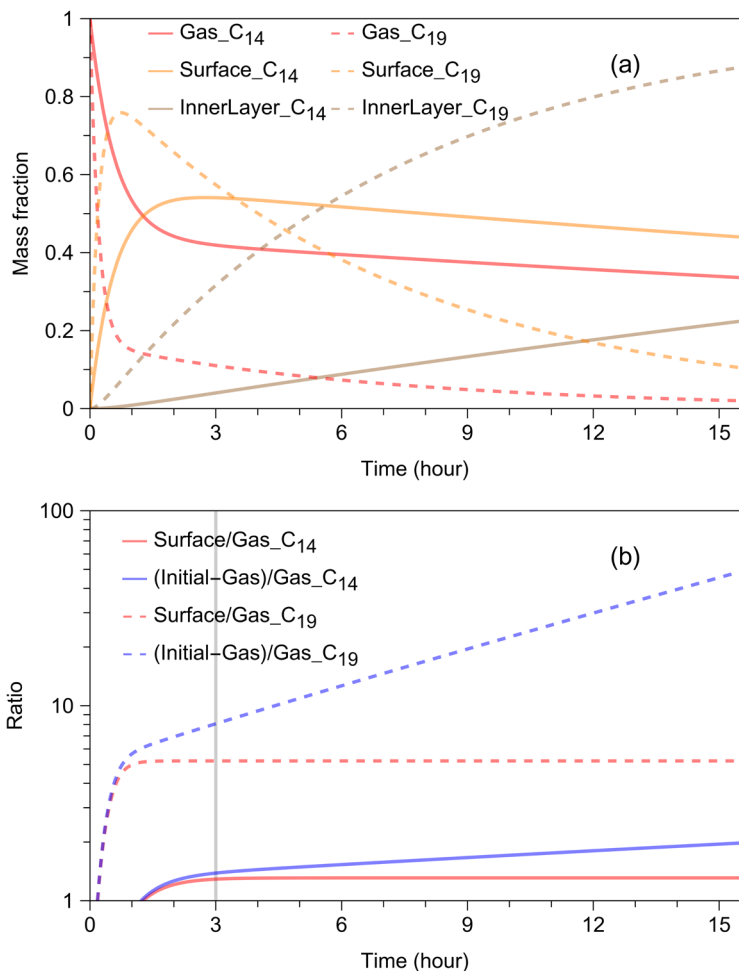

**Figure S4.** Simulation results of the two-layer model for room temperature experiment (Figure 3). (a) Time series of mass fraction of the total injection in gas, surface, and inner layer phases for C<sub>14</sub> and C<sub>19</sub> *n*-alkanes. Solid and dashed lines represent C<sub>14</sub> and C<sub>19</sub> *n*-alkanes respectively. Red, orange, and brown lines represent mass fractions in gas, surface, and inner layer phases respectively. (b) Time series of the ratio of mass in surface and gas phase and the ratio of mass not in and in the gas phase for C<sub>14</sub> and C<sub>19</sub> *n*-alkanes. Solid and dashed lines represent C<sub>14</sub> and C<sub>19</sub> *n*-alkanes respectively. Red and blue lines represent the theoretical and measured  $C_{surface}/C_{gas}$  in the main text respectively. The gray solid line indicates 3 hours as we choose the 3-hour measurements to calculate  $C_{surface}/C_{gas}$  in the main text.

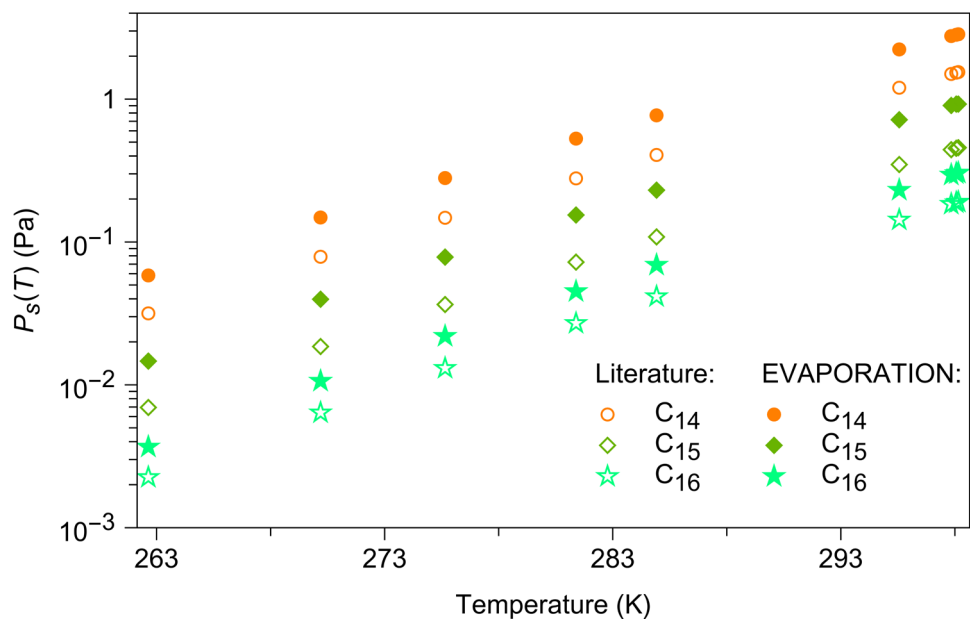

**Figure S5.** Saturation vapor pressures at different experimental temperatures for C<sub>14</sub>-C<sub>16</sub> *n*-alkanes calculated by the EVAPORATION method (Compennolle et al., 2011) and the Clausius–Clapeyron equation with literature values (Fitzpatrick, 2004; Rumble, 2022).

**Text S1.** Uncertainty in  $C_{surface}/C_{gas}$  by employment of 3-hour measurement data.

Uncertainties in  $C_{surface}/C_{gas}$  for  $C_{14}$  and  $C_{19}$  *n*-alkanes at room temperature by employment of the 3-hour measurement data are shown in Figure S4b. The discrepancy between the red lines and corresponding blue lines at 3 hours is the bias caused by the employment of 3-hour measurements. For  $C_{14}$  and  $C_{19}$  *n*-alkanes, this method overestimates 7% and 55 %. A more extreme case was used to simulate the low-temperature experiment by employing 10 times at  $k_1$  of  $C_{19}$  *n*-alkane and the maximum  $k_2$  in all the experiments. In this case, this method overestimates  $C_{surface}/C_{gas}$  within 62 % of the theoretical values.

## Reference

- Compernelle, S., Ceulemans, K., and Muller, J. F.: EVAPORATION: a new vapour pressure estimation method for organic molecules including non-additivity and intramolecular interactions, *Atmos. Chem. Phys.*, 11, 9431-9450, <https://doi.org/10.5194/acp-11-9431-2011>, 2011.
- Fitzpatrick, R. B.: Haz-Map, *Medical Reference Services Quarterly*, 23, 49-56, [https://doi.org/10.1300/J115v23n02\\_05](https://doi.org/10.1300/J115v23n02_05), 2004.
- Krechmer, J. E., Pagonis, D., Ziemann, P. J., and Jimenez, J. L.: Quantification of Gas-Wall Partitioning in Teflon Environmental Chambers Using Rapid Bursts of Low-Volatility Oxidized Species Generated in Situ, *Environ. Sci. Technol.*, 50, 5757-5765, <https://doi.org/10.1021/acs.est.6b00606>, 2016.
- Matsunaga, A. and Ziemann, P. J.: Gas-Wall Partitioning of Organic Compounds in a Teflon Film Chamber and Potential Effects on Reaction Product and Aerosol Yield Measurements, *Aerosol Sci. Technol.*, 44, 881-892, <https://doi.org/10.1080/02786826.2010.501044>, 2010.
- Rumble, J.: *CRC handbook of chemistry and physics*, CRC press, ISBN978-1032121710, 2022.
- Yeh, G. K. and Ziemann, P. J.: Alkyl Nitrate Formation from the Reactions of C-8-C-14 n-Alkanes with OH Radicals in the Presence of NOx: Measured Yields with Essential Corrections for Gas-Wall Partitioning, *J. Phys. Chem. A*, 118, 8147-8157, <https://doi.org/10.1021/jp500631v>, 2014.
- Yeh, G. K. and Ziemann, P. J.: Gas-Wall Partitioning of Oxygenated Organic Compounds: Measurements, Structure-Activity Relationships, and Correlation with Gas Chromatographic Retention Factor, *Aerosol Sci. Technol.*, 49, 726-737, <https://doi.org/10.1080/02786826.2015.1068427>, 2015.
